# Supplementary material
Source: publisher site journal article supplement (https://www.dovepress.com/article/556206)
Supplement: Supplementary file 1 [file 556206%20Revised%20%252509Supplementary%20material.docx]

# **Supplementary Material**

## ***Supplement 1. Complete List of Inclusion and Exclusion Criteria***

**Inclusion criteria**

Patients meeting **all** of the following criteria are eligible for the trial

- Scheduled for unilateral, primary TKA
- Age 40–85 years
- No gender restriction
- BMI 18–40 kg/m²
- ASA 1-3
- No chronic preoperative pain (defined as no regular analgesic use within 3 months prior to surgery)
- Comprehension of the VAS pain scale (≥80% accuracy in post-training test)
- Provision of written informed consent for trial participation after fully understanding the protocol requirements and restrictions.

**Exclusion criteria**

Patients meeting **any** of the following criteria are excluded from the trial:

- Patients who cannot cooperate with the trial
- Concomitant participation in another trial
- Neuropathic pain requiring anticonvulsant/antidepressant therapy or non-osteoarthritic pain sources (e.g., radiculopathy, CRPS).
- Patients with allergy to the medicines used in the trial.
- Contraindications against NSAID, ulinastatin or morphine, including: history of peptic ulcer, heart failure (NYHA class III–IV), liver failure (Child-Pugh B/C), or renal failure (eGRF < 60 ml/kg/1.73m2), known thrombocytopenia (< 100,000/μL)
- Uncontrolled major depression (PHQ-9 ≥20) or cognitive impairment (MMSE ≤24)
- Intraoperative hemorrhage >1000 mL or requiring transfusion
- Postoperative ICU admission
- Any other condition deemed by the investigator or attending physician as rendering the patient unsuitable for trial participation.

## ***Supplement 2. Tables***

**Table S1.** Pain scores in 72h for each group

|  | **UTI Group**  **(n = 49)** | **FA Group**  **(n = 50)** | **Control Group**  **(n = 50)** | ***P*-value** |
| --- | --- | --- | --- | --- |
| Pain at rest at 24 h postoperatively, VAS (mm) | 20 (19, 25) | 20 (15, 25) | 20 (20, 30) | *.211* |
| Pain at rest at 48 h postoperatively, VAS (mm) | 20 (10, 20) | 20 (10, 20) | 20 (15, 25) | *.158* |
| Pain at rest at 72 h postoperatively, VAS (mm) | 20 (13, 20) | 15 (10, 20) | 19 (10, 20) | *.180* |
| Pain during mobilization at 72 h postoperatively, VAS (mm) | 40 (30, 40) | 35 (30, 40) | 40 (30, 45) | *.246* |

**Abbreviations:** VAS, Visual Analogue Scale (0-100 mm). Data are median (IQR), and intergroup comparisons are performed using the Kruskal-Wallis test (P< 0.05 considered significant).

## ***Supplement 3. Figure***

|  |
| --- |
| **Figure S1**. Postoperative morphine consumption at each independent time period.  Bar chart illustrating the mean and standard deviation (SD) of morphine consumption across time periods by different groups. Group assignments are represented by the ICONS shown in the legend. Horizontal brackets above the bars represent statistically significant pairwise comparisons between groups, with corresponding P-values displayed above each bracket. All displayed P-values are statistically significant. |
